# Supplementary material for: Muscle overexpression of Klf15 via an AAV8-Spc5-12 construct does not provide benefits in spinal muscular atrophy mice
Source: PubMed Central journal article supplement (PMC7674152; doi:10.1038/s41434-020-0146-8), 2020-04-20

\*  *Smn*<sup>-/-</sup>;SMN2 (AAV8-*Klf15* 1E10 vg/pup)  
 *Smn*<sup>-/-</sup>;SMN2 (AAV8-*Klf15* 2E10 vg/pup)

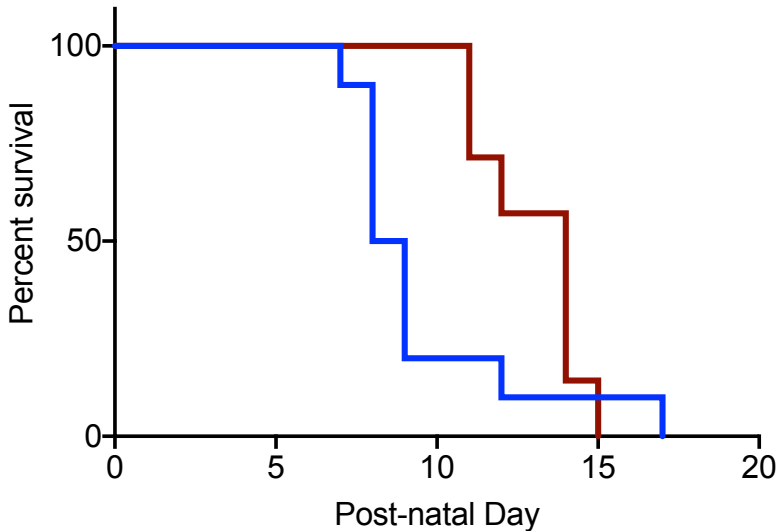

Supplement: 41434_2020_146_MOESM1_ESM.pdf [file 41434_2020_146_MOESM1_ESM.pdf]
